# Supplementary material for: B cell deficiency promotes the initiation and progression of lung cancer
Source: PubMed Central journal article supplement (PMC9556970; doi:10.3389/fonc.2022.1006477), 2022-09-29
Supplement: DataSheet_1.pdf [file DataSheet_1.pdf]

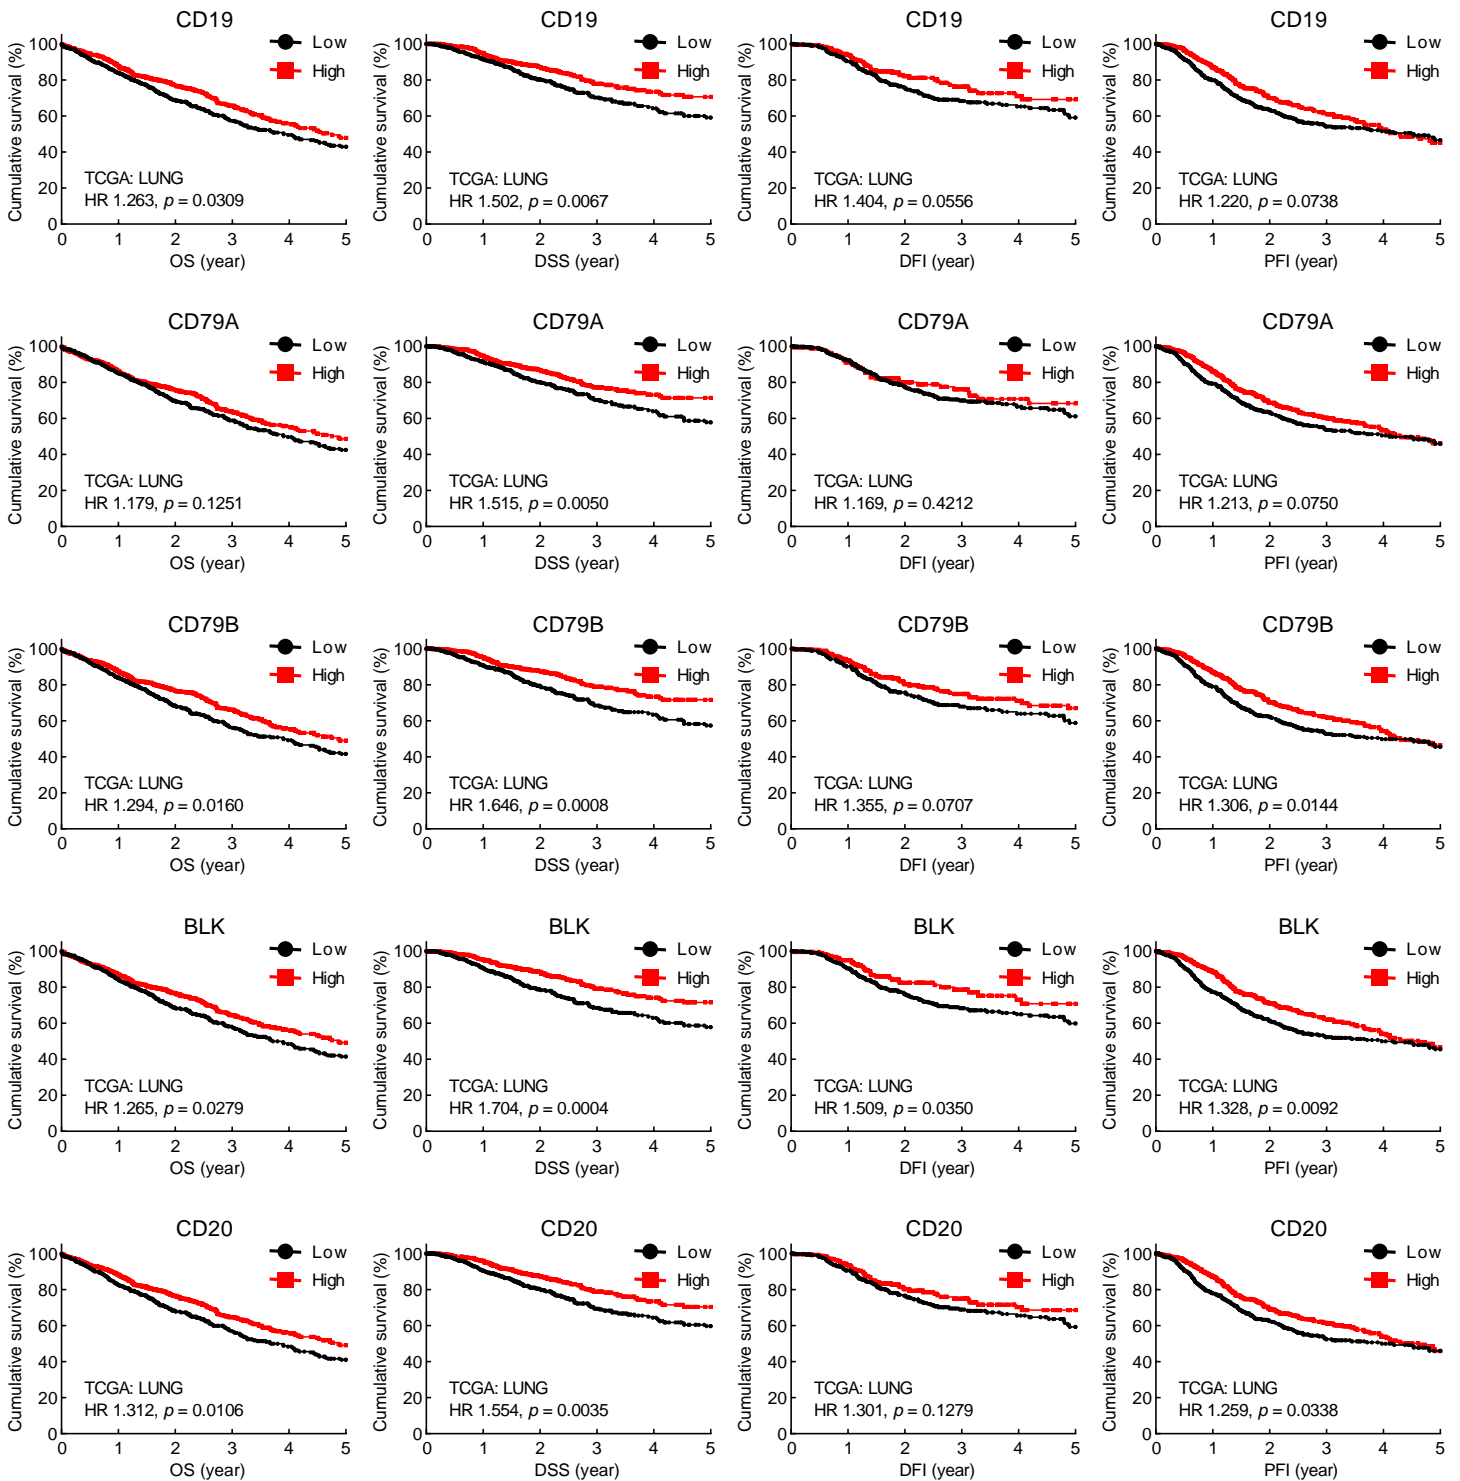

**FIGURE S1** Specific B cell markers are positively associated with patient survival in lung cancer. TCGA LUNG data showing positive correlation between specific B cell markers (CD19, CD79A, CD79B, BLK, and CD20) and overall survival (OS), disease specific survival (DSS), disease free interval (DFI), and progression free interval (PFI) in lung cancer. The hazard ratio (HR) and the log-rank  $p$  value for Kaplan-Meier curve were shown in plots.

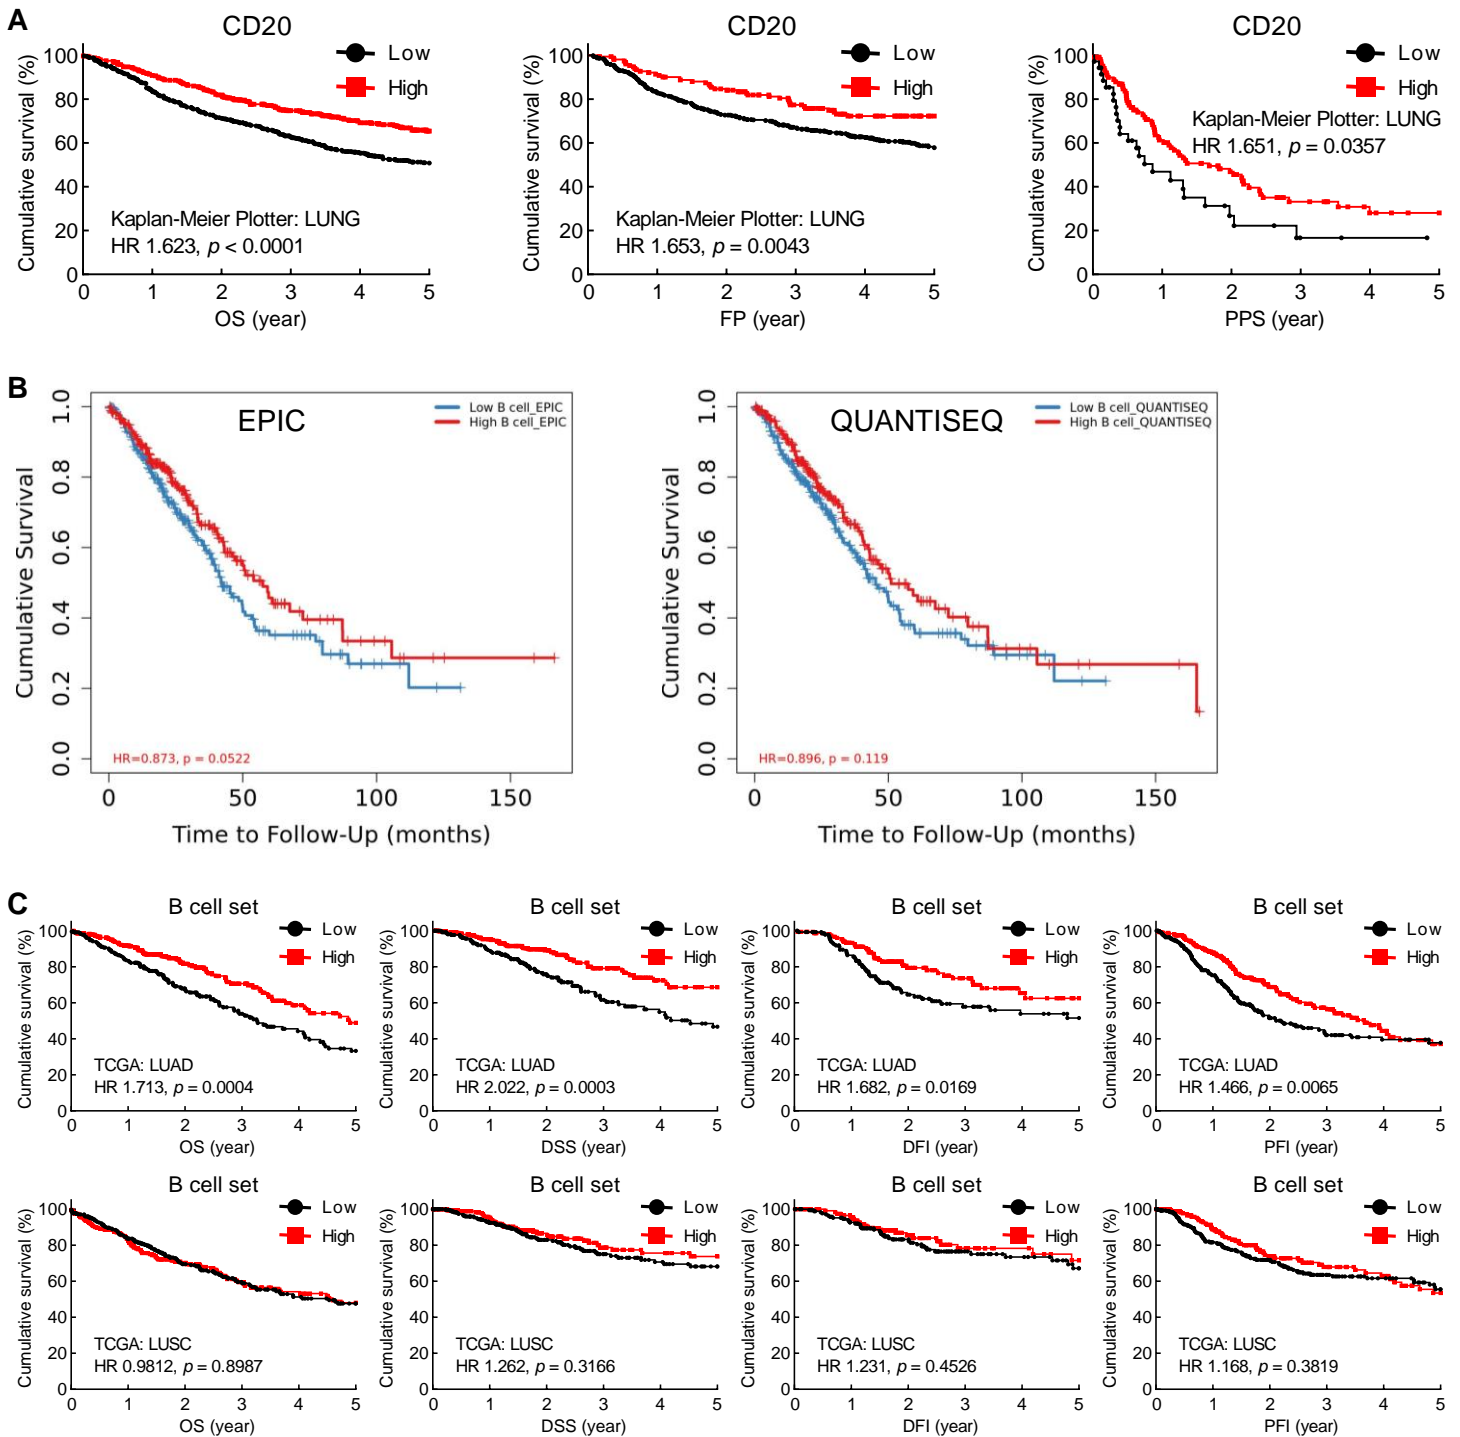

**FIGURE S2** B cells are positively associated with patient survival in lung adenocarcinoma. **(A)** Kaplan-Meier Plotter data showing positive association of CD20 expression with overall survival (OS), first progression (FP), and post-progression survival (PPS). **(B)** Kaplan-Meier curves exhibiting a trend of positive association between B cell infiltrates and patient survival in lung adenocarcinoma (LUAD) by EPIC and QUANTISEQ algorithms. The infiltration level is equally divided into low and high levels. **(C)** TCGA LUNG data showing positive correlation between B cells and overall survival (OS), disease specific survival (DSS), disease free interval (DFI), and progression free interval (PFI) in lung adenocarcinoma (LUAD, upper panel) but not lung squamous cell carcinoma (LUSC, lower panel). The hazard ratio (HR) and the log-rank  $p$  value for Kaplan-Meier curve were shown in plots.

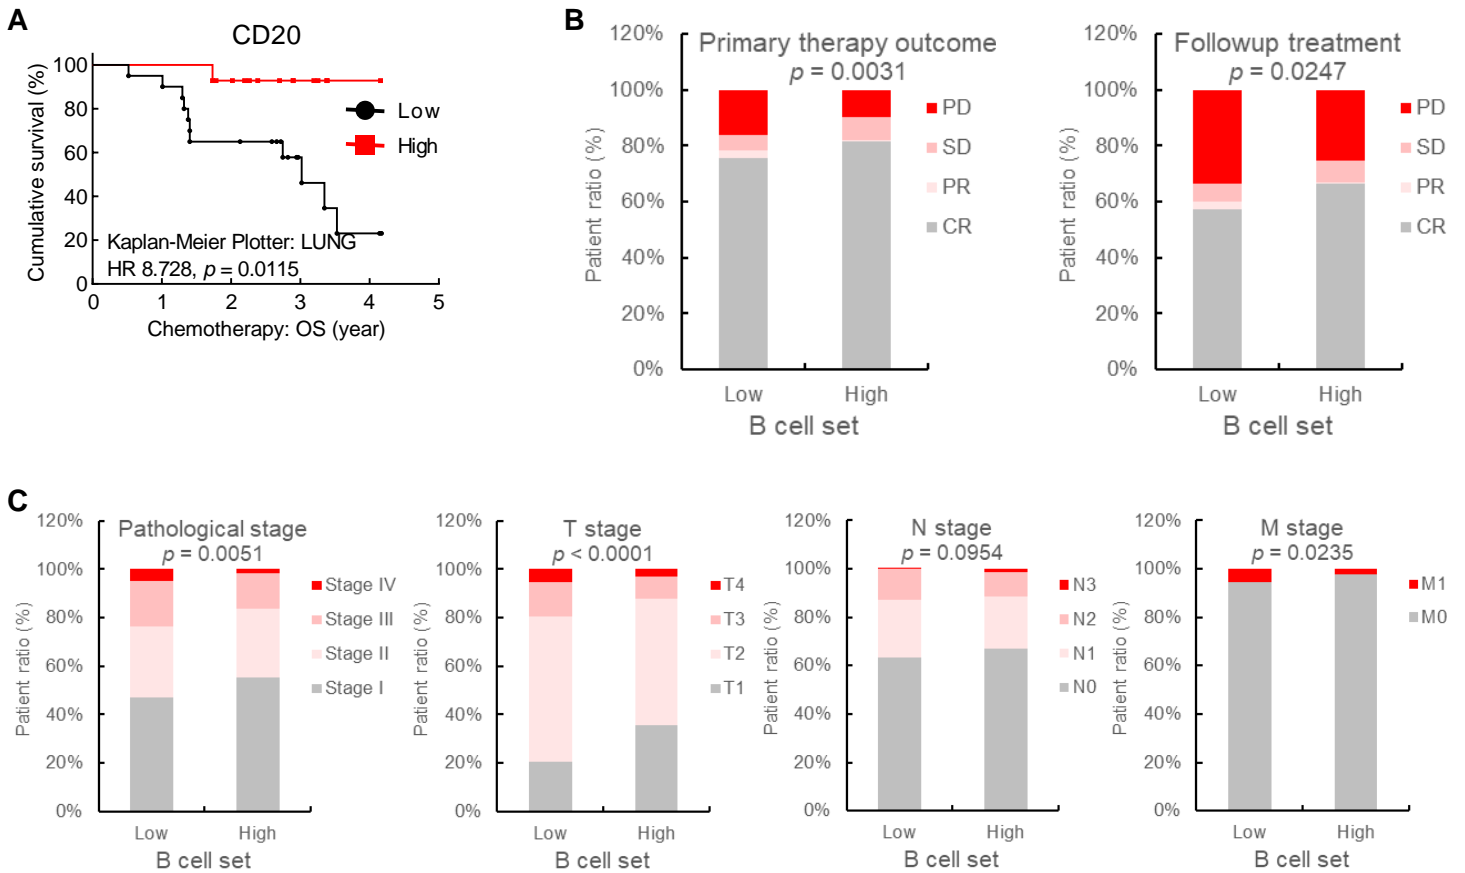

**FIGURE S3** High B cell abundance is associated with better therapeutic response and delayed progression in lung cancer. **(A)** Kaplan-Meier Plotter data showing better overall survival (OS) of patient with high CD20 expression level in the context of chemotherapy. **(B)** TCGA LUNG data showing improved clinical outcomes in patient with high tumor infiltration of B cell. **(C)** TCGA LUNG data showing delayed cancer progression in patient with high tumor infiltration of B cell. PD: progressive disease; SD: stable disease; PR: partial remission/response; CR: complete remission/response. The hazard ratio (HR) and the log-rank  $p$  value for Kaplan-Meier curve were shown in plot **(A)**. Chi-square test was performed in **(B-C)**.

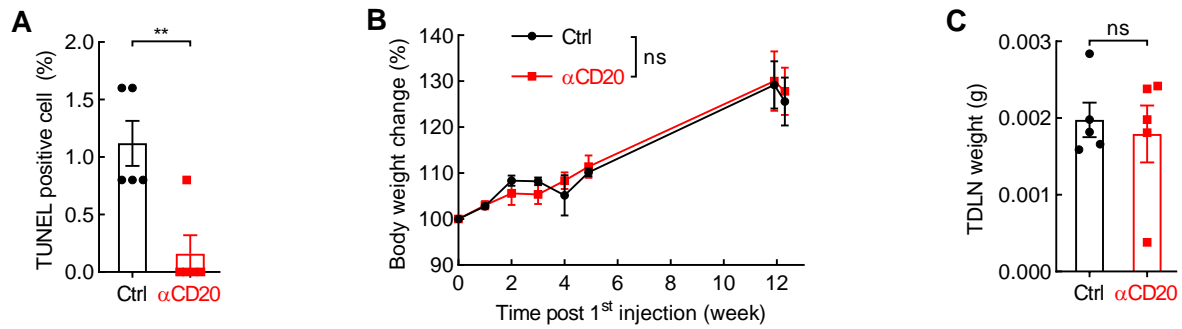

**FIGURE S4** B cell depletion has minimal impact on body weight in lung cancer. **(A)** TUNEL assay showing decreased tumor cell apoptosis in mice with  $\alpha$ CD20-mediated B cell depletion (n = 5). **(B-C)** No significant effect of  $\alpha$ CD20-mediated B cell depletion on body weight (**B**, n = 5) and TDLN weight (**C**, n = 5). TDLN: mediastinum lymph node. Student's *t* test (two tailed, unpaired) was performed. Data represented means  $\pm$  SEM. ns, not statistically significant.

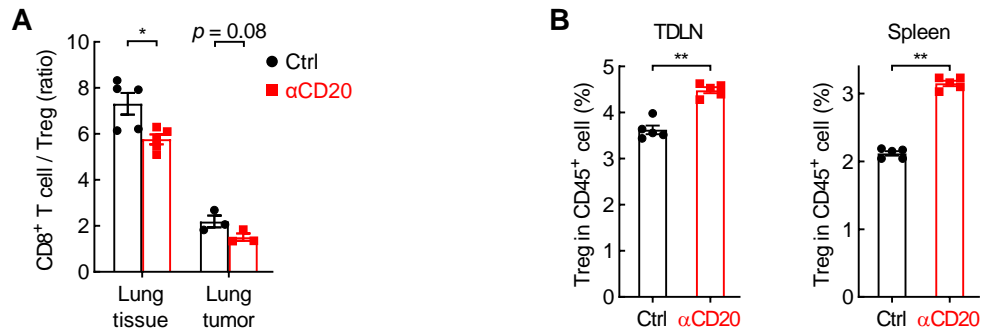

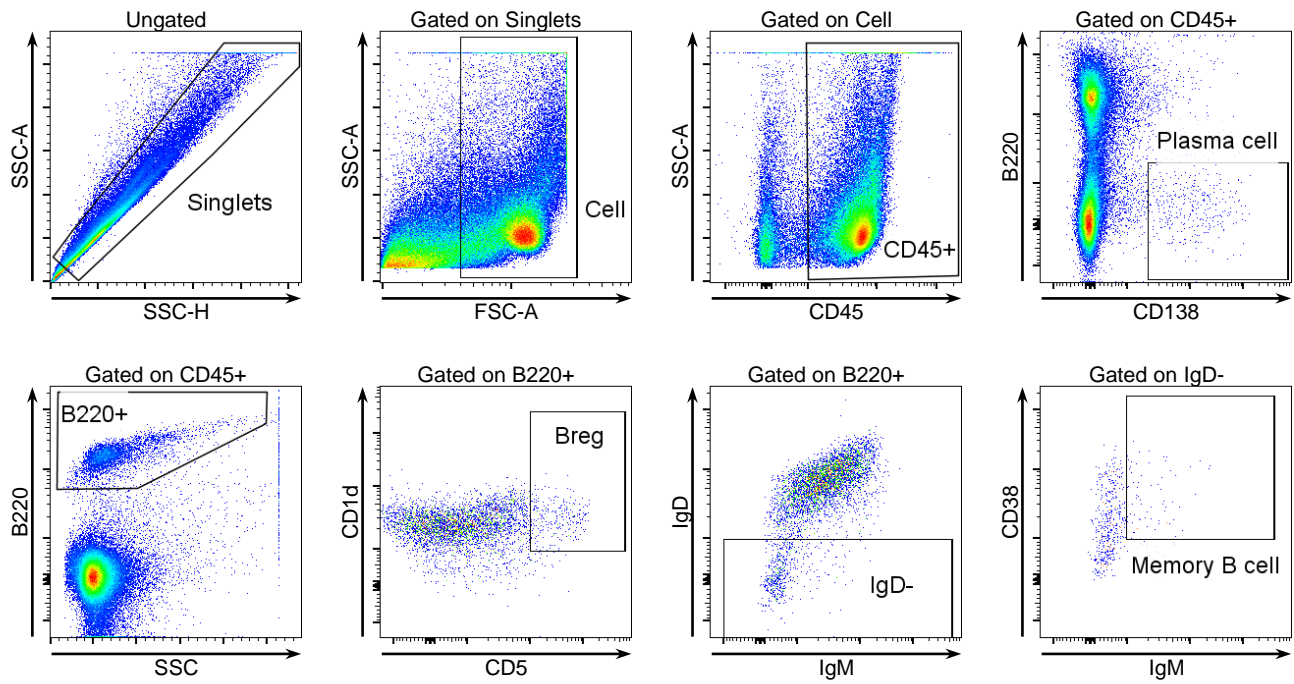

**FIGURE S6** FACS gating strategy for B cell subsets in murine tissues. Gating strategy for total B cell (B220+), Breg (B220+CD1d+CD5+), memory B cell (B220+IgD-IgM+CD38+), and plasma cell (B220-CD138+) from CD45+ immune cells.

**TABLE S1** Antibody list

| Antibody                          | Clone                          | Cat. No.   | Company                                     | Usage               | Purpose                 |
|-----------------------------------|--------------------------------|------------|---------------------------------------------|---------------------|-------------------------|
| Anti-B220 BV510                   | RA3-6B2, rat IgG2a, κ          | 103248     | Biolegend, San Diego, CA, USA               | 2.5 µl per sample   | FACS                    |
| Anti-CD11b PE                     | M1/70, rat IgG2b, κ            | 12-0112-82 | Thermo Fisher Scientific, Waltham, MA, USA  | 0.625 µl per sample | FACS                    |
| Anti-CD11c APC-eFluor780          | N418, armenian hamster IgG     | 47-0114-82 | Thermo Fisher Scientific, Waltham, MA, USA  | 2.5 µl per sample   | FACS                    |
| Anti-CD138 PE                     | 281-2, rat IgG2a, κ            | 142504     | Biolegend, San Diego, CA, USA               | 1.25 µl per sample  | FACS                    |
| Anti-CD16/CD32                    | 93, rat IgG2a, λ               | 14-0161-85 | Thermo Fisher Scientific, Waltham, MA, USA  | 1.0 µl per sample   | FACS                    |
| Anti-CD1d PerCP-Cy5.5             | 1B1, rat IgG2b, κ              | 123514     | Biolegend, San Diego, CA, USA               | 1.25 µl per sample  | FACS                    |
| Anti-CD24 BV510                   | M1/69, rat IgG2b, κ            | 101831     | Biolegend, San Diego, CA, USA               | 2.5 µl per sample   | FACS                    |
| Anti-CD25 PE                      | PC61.5, rat IgG1, λ            | 12-0251-81 | Thermo Fisher Scientific, Waltham, MA, USA  | 0.625 µl per sample | FACS                    |
| Anti-CD38 APC                     | 90, rat IgG2a, κ               | 102712     | Biolegend, San Diego, CA, USA               | 1.25 µl per sample  | FACS                    |
| Anti-CD3e APC-eFluor780           | 145-2C11, armenian hamster IgG | 47-0031-82 | Thermo Fisher Scientific, Waltham, MA, USA  | 5 µl per sample     | FACS                    |
| Anti-CD3e PE                      | 145-2C11, armenian hamster IgG | 12-0031-83 | Thermo Fisher Scientific, Waltham, MA, USA  | 2.5 µl per sample   | FACS                    |
| Anti-CD4 APC-eFluor780            | RM4-5, rat IgG2a, κ            | 47-0042-82 | Thermo Fisher Scientific, Waltham, MA, USA  | 0.625 µl per sample | FACS                    |
| Anti-CD4 PE-Cy7                   | RM4-5, rat IgG2a, κ            | 25-0042-81 | Thermo Fisher Scientific, Waltham, MA, USA  | 1.25 µl per sample  | FACS                    |
| Anti-CD45 Alexa Fluor 700         | 30-F11, rat IgG2b, κ           | 103128     | Biolegend, San Diego, CA, USA               | 0.5 µl per sample   | FACS                    |
| Anti-CD47 FITC                    | miap301, rat IgG2a, κ          | 11-0471-82 | Thermo Fisher Scientific, Waltham, MA, USA  | 2 µl per sample     | FACS                    |
| Anti-CD5 PE-Cy7                   | 53-7.3, rat IgG2a, κ           | 100621     | Biolegend, San Diego, CA, USA               | 1.25 µl per sample  | FACS                    |
| Anti-CD64 PE-Cy7                  | X54-5/7.1, mouse IgG1, κ       | 139314     | Biolegend, San Diego, CA, USA               | 2.5 µl per sample   | FACS                    |
| Anti-CD8a APC                     | 53-6.7, rat IgG2a, κ           | 17-0081-83 | Thermo Fisher Scientific, Waltham, MA, USA  | 0.625 µl per sample | FACS                    |
| Anti-EpCAM BV421                  | G8.8, rat IgG2a, κ             | 118225     | Biolegend, San Diego, CA, USA               | 1.25 µl per sample  | FACS                    |
| Anti-Foxp3 FITC                   | FJK-16s, rat IgG2a, κ          | 11-5773-82 | Thermo Fisher Scientific, Waltham, MA, USA  | 2.0 µl per sample   | FACS                    |
| Anti-Granzyme B FITC              | NGZB, rat IgG2a, κ             | 11-8898-80 | Thermo Fisher Scientific, Waltham, MA, USA  | 0.25 µl per sample  | FACS                    |
| Anti-IFNγ FITC                    | XMG1.2, rat IgG1, κ            | 11-7311-81 | Thermo Fisher Scientific, Waltham, MA, USA  | 1.0 µl per sample   | FACS                    |
| Anti-IgD APC-Cy7                  | 11-26c.2a, rat IgG2a, κ        | 405715     | Biolegend, San Diego, CA, USA               | 1.25 µl per sample  | FACS                    |
| Anti-IgM FITC                     | RMM-1, rat IgG2a, κ            | 406506     | Biolegend, San Diego, CA, USA               | 2 µl per sample     | FACS                    |
| Anti-Ly6C BV650                   | HK1.4, rat IgG2c, κ            | 128049     | Biolegend, San Diego, CA, USA               | 1.25 µl per sample  | FACS                    |
| Anti-Ly6G BV510                   | 1A8, rat IgG2a, κ              | 127633     | Biolegend, San Diego, CA, USA               | 2.5 µl per sample   | FACS                    |
| Anti-MerTK Super Bright 436       | DS5MMER, rat IgG2a, κ          | 62-5751-82 | Thermo Fisher Scientific, Waltham, MA, USA  | 5.0 µl per sample   | FACS                    |
| Anti-MHC-II APC                   | M5/114.15.2, rat IgG2b, κ      | 17-5321-82 | Thermo Fisher Scientific, Waltham, MA, USA  | 0.15 µl per sample  | FACS                    |
| Anti-NKp46 BV421                  | 29A1.4, rat IgG2a, κ           | 137612     | Biolegend, San Diego, CA, USA               | 2.5 µl per sample   | FACS                    |
| Anti-PD-L1 Super Bright 780       | MIH5, rat IgG2a, λ             | 78-5982-82 | Thermo Fisher Scientific, Waltham, MA, USA  | 0.3 µl per sample   | FACS                    |
| Anti-CD20                         | SA271G2, rat IgG2b, κ          | 152116     | Biolegend, San Diego, CA, USA               | 200 µg/mouse/time   | <i>in vivo</i> blockade |
| Anti-Cleaved Caspase 3            | Asp175, rabbit polyclonal      | 9661       | Cell Signaling Technology, Danvers, MA, USA | 1:200               | IHC                     |
| Goat anti-rabbit IgG biotinylated |                                | E0432      | Dako, Carpinteria, CA, USA                  | 1:300               | IHC                     |
